# Supplementary material for: Changing the shape of chromophores from “H-type” to “star-type”: increasing the macroscopic NLO effects by a large degree
Source: Royal Society of Chemistry journal article supplement (doi:10.1039/c2py20554h), 2012-08-29
Supplement: c2py20554h.pdf [file c2py20554h.pdf]

## Electronic Supplementary Information:

### Changing the shape of chromophores from “H-type” to “Star-type”: increasing the macroscopic NLO effects in a large degree

Wenbo Wu, Can Wang, Cheng Zhong,<sup>a</sup> Cheng Ye, Guofu Qiu, Jingui Qin, and Zhen Li\*

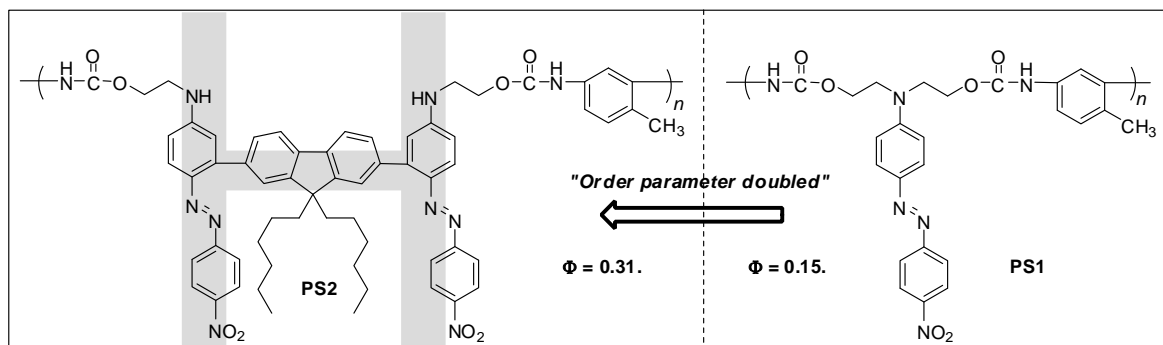

Chart S1. The structure of polyurethanes embedded with “H-type” chromophores.

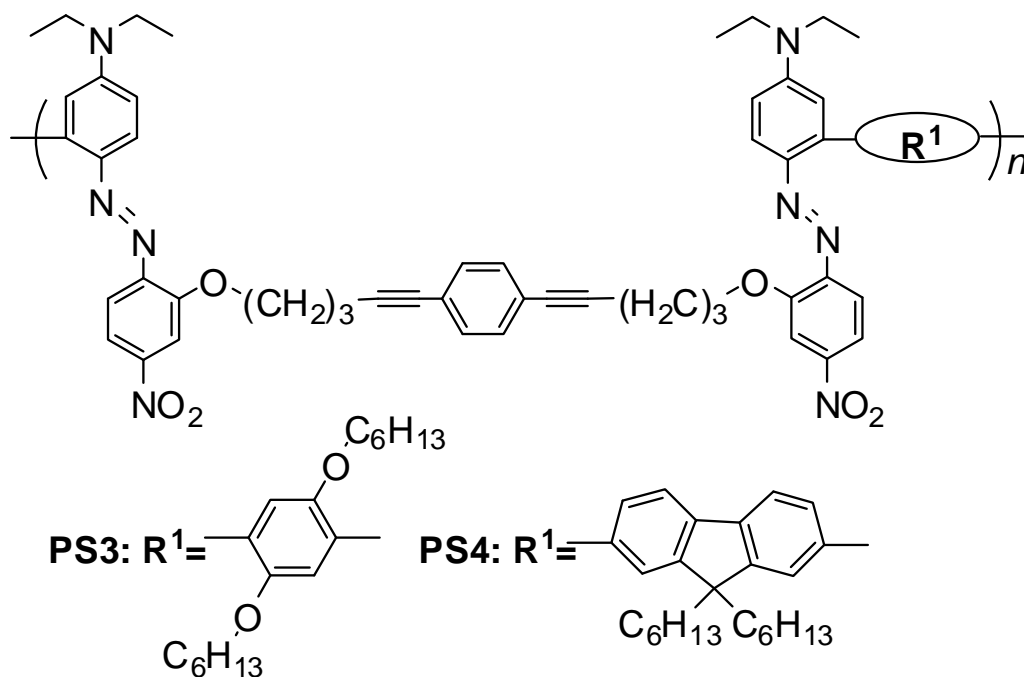

Chart S2. The structure of “H-sharp” NLO polymers PS3 and PS4.

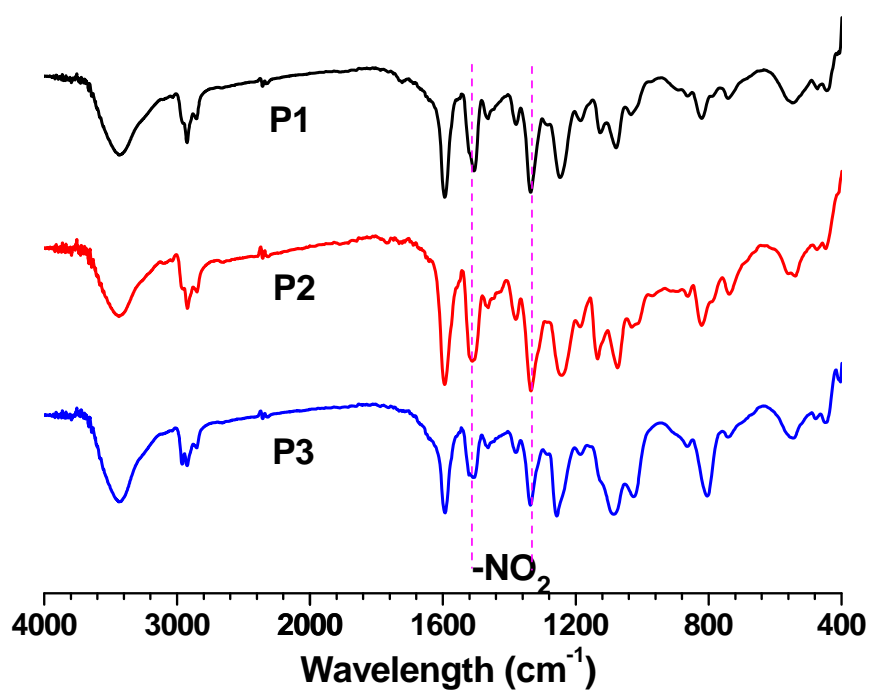

Fig. S1. The FT-IR spectra of polymers P1-P3.

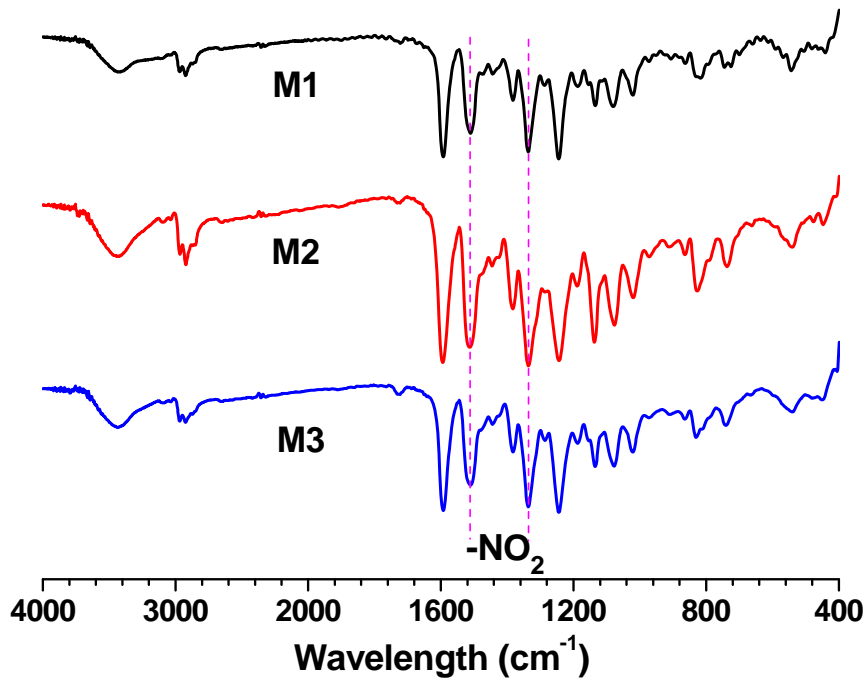

Fig. S2. The FT-IR spectra of monomers M1-M3.

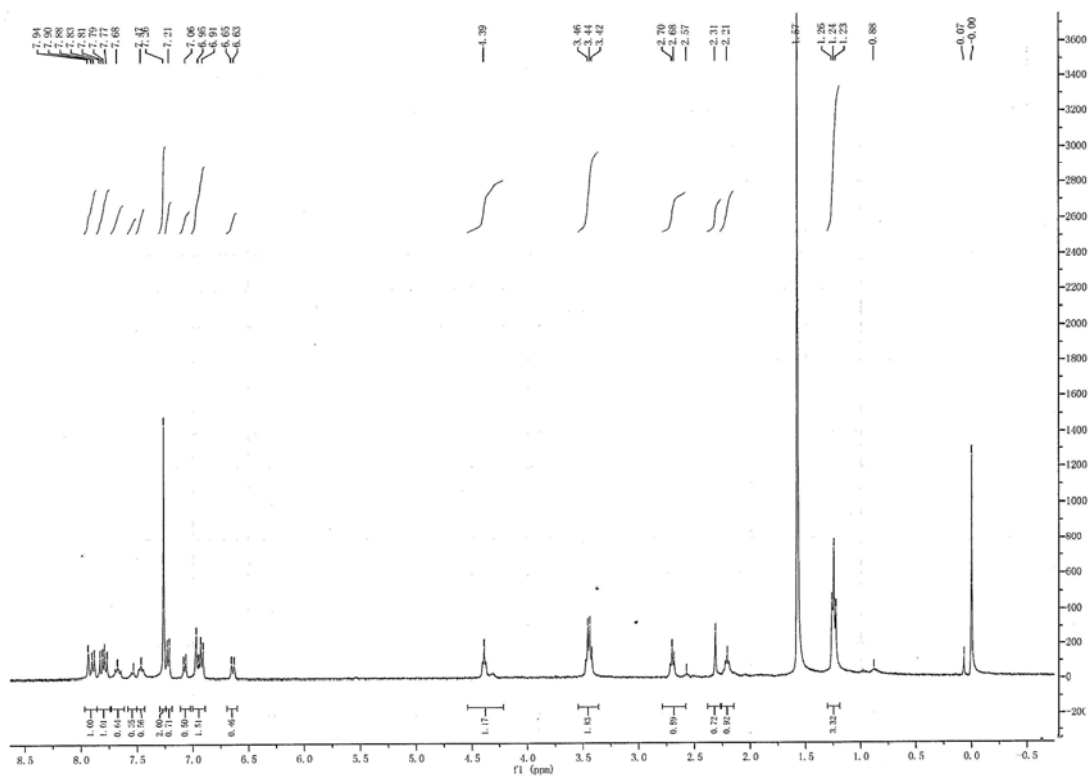

**Fig. S3.**  $^1\text{H}$  NMR spectrum of monomer **M1** in chloroform-*d*.

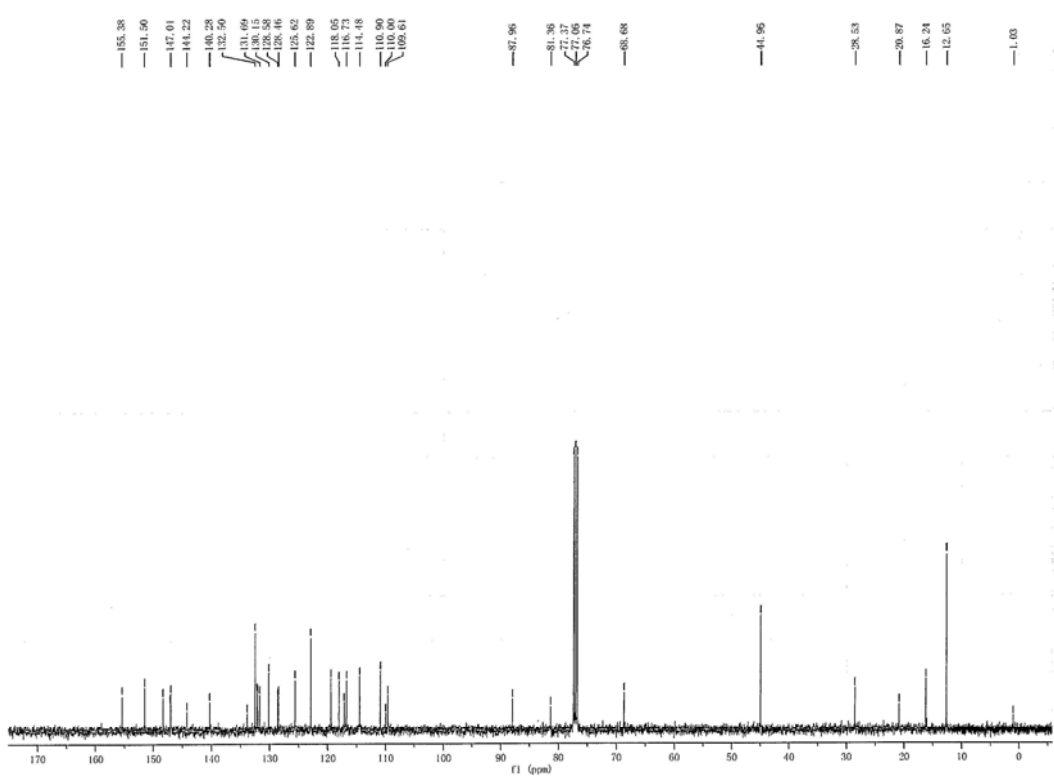

**Fig. S4.**  $^{13}\text{C}$  NMR spectrum of monomer **M1** in chloroform-*d*.

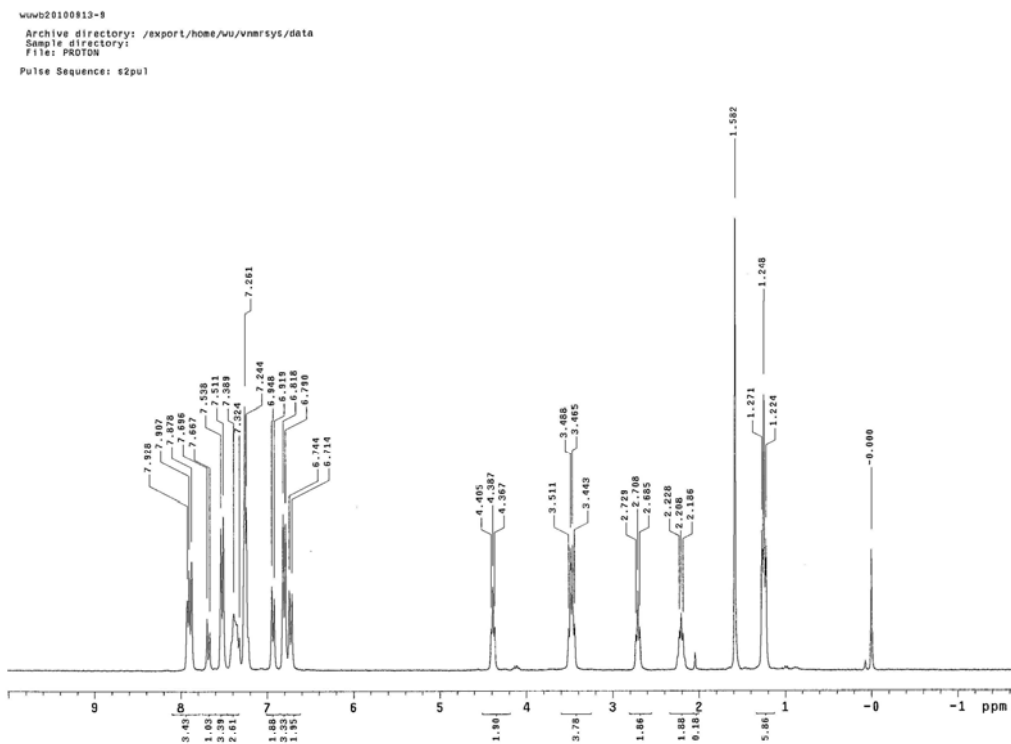

**Fig. S5.**  $^1\text{H}$  NMR spectrum of chromophore **S5** in chloroform-*d*.

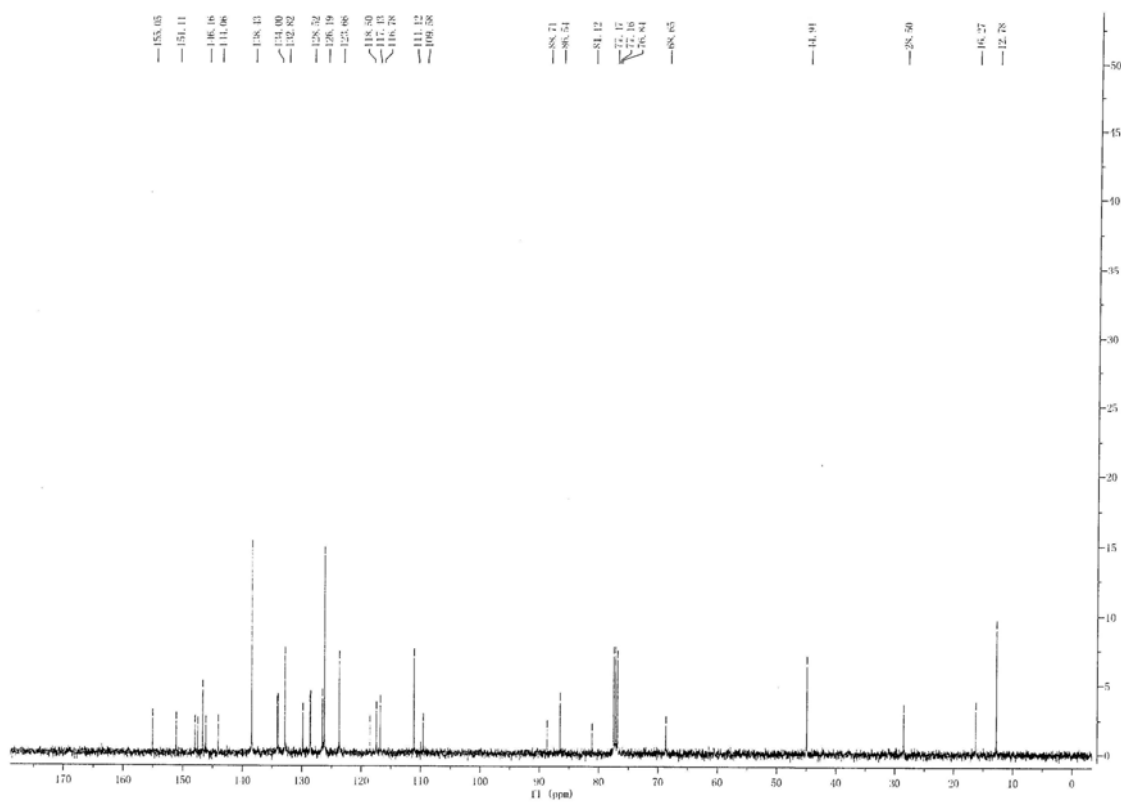

**Fig. S6.**  $^{13}\text{C}$  NMR spectrum of chromophore **S5** in chloroform-*d*.



wuw620111025

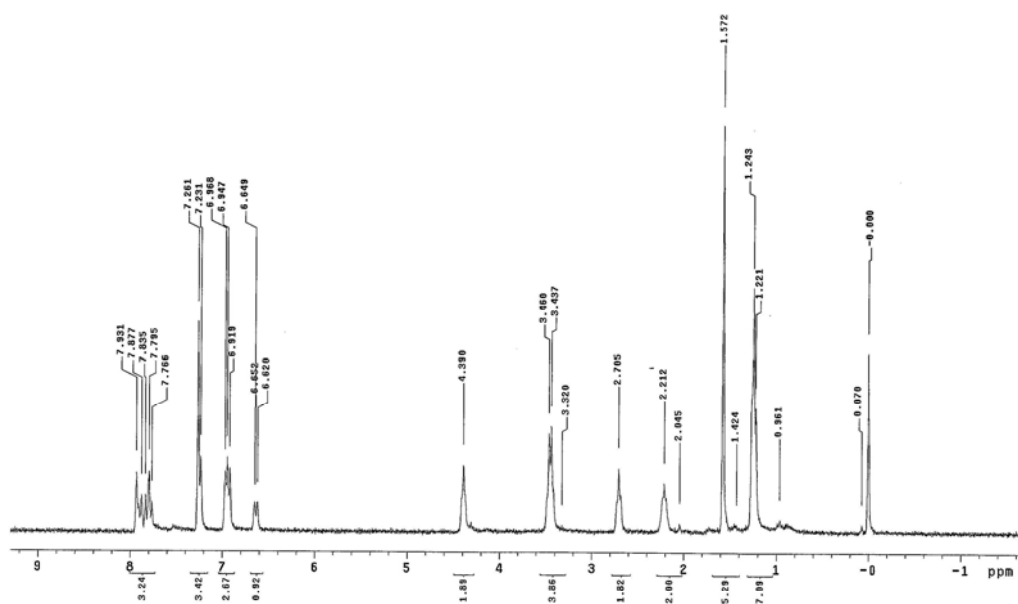

Fig. S9.  $^1\text{H}$  NMR spectrum of monomer **M3** in chloroform-*d*.

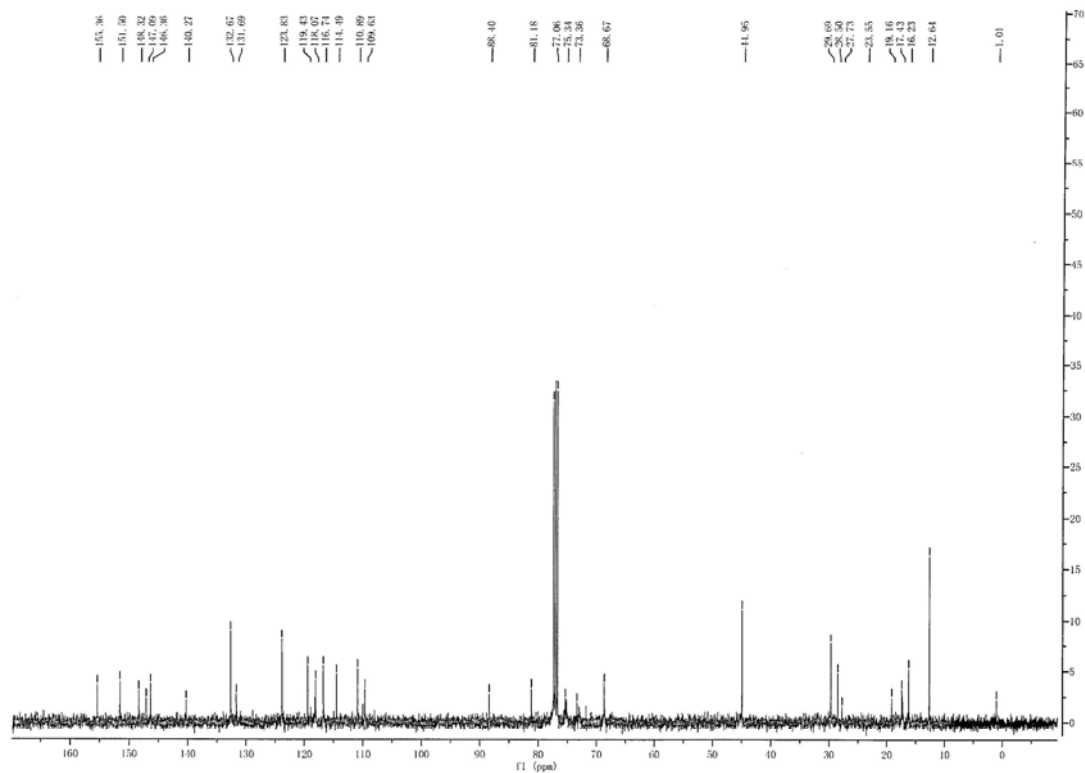

Fig. S10.  $^{13}\text{C}$  NMR spectrum of monomer **M3** in chloroform-*d*.



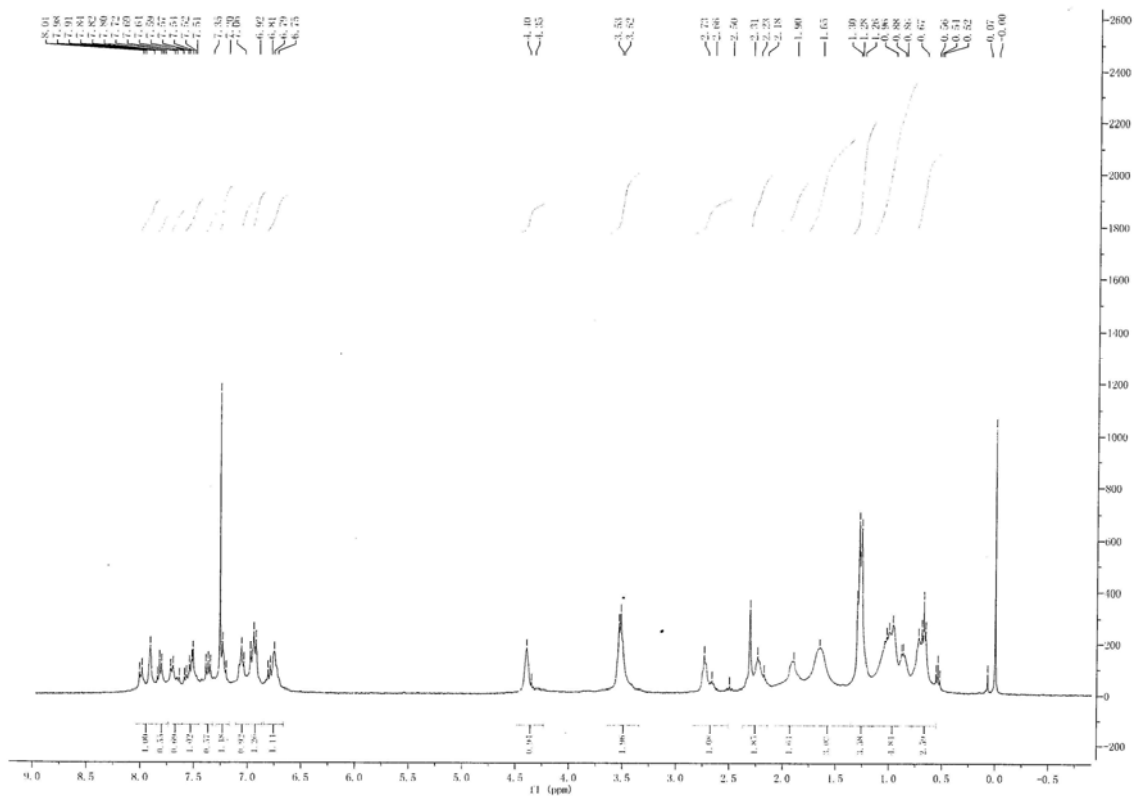

**Fig. S13.**  $^1\text{H}$  NMR spectrum of polymer **P1** in chloroform-*d*.

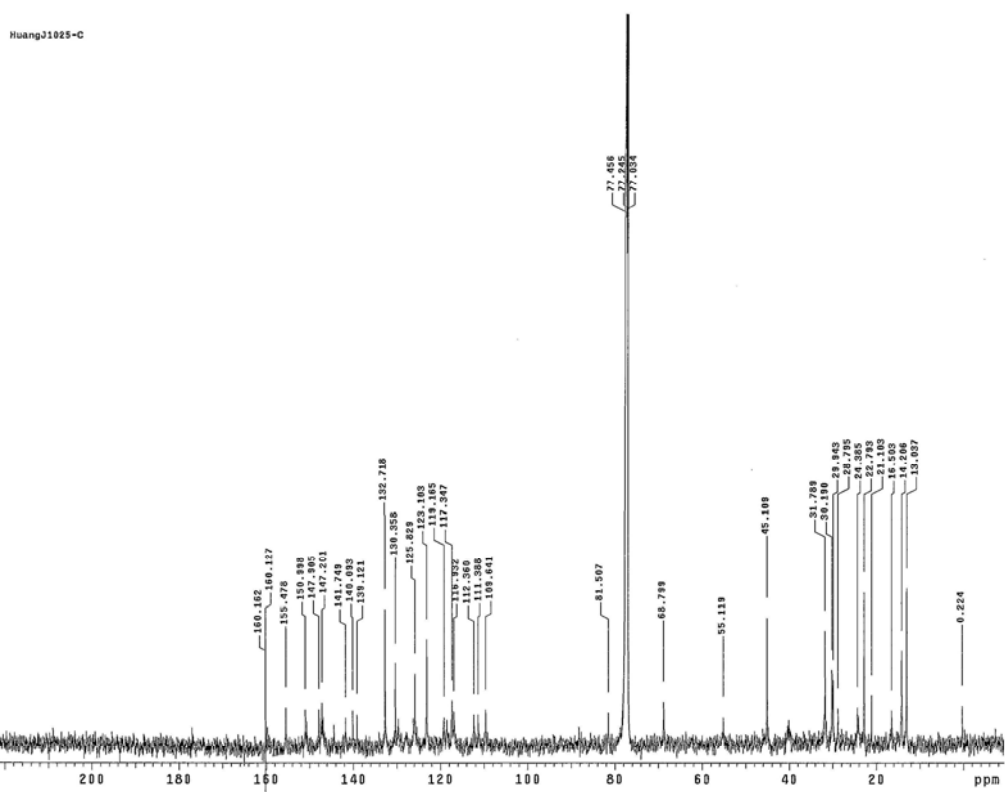

**Fig. S14.**  $^{13}\text{C}$  NMR spectrum of polymer **P1** in chloroform-*d*.



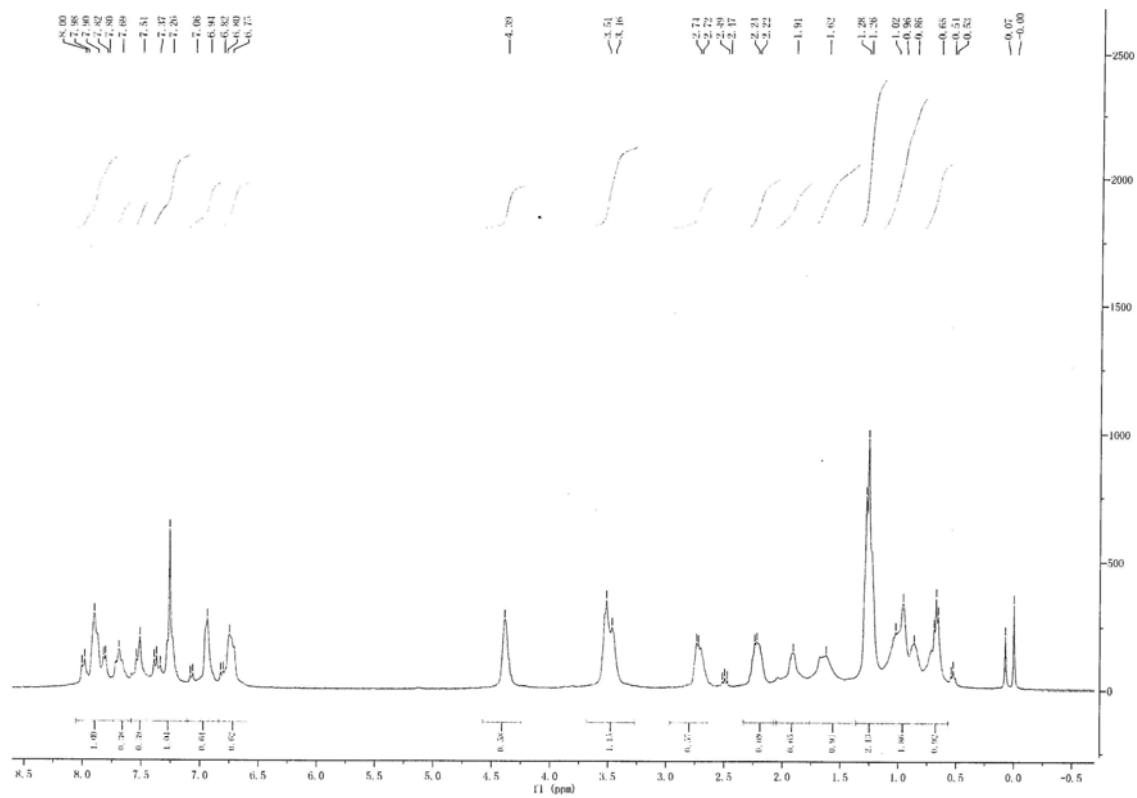

Fig. S15.  $^1\text{H}$  NMR spectrum of polymer **P2** in chloroform-*d*.

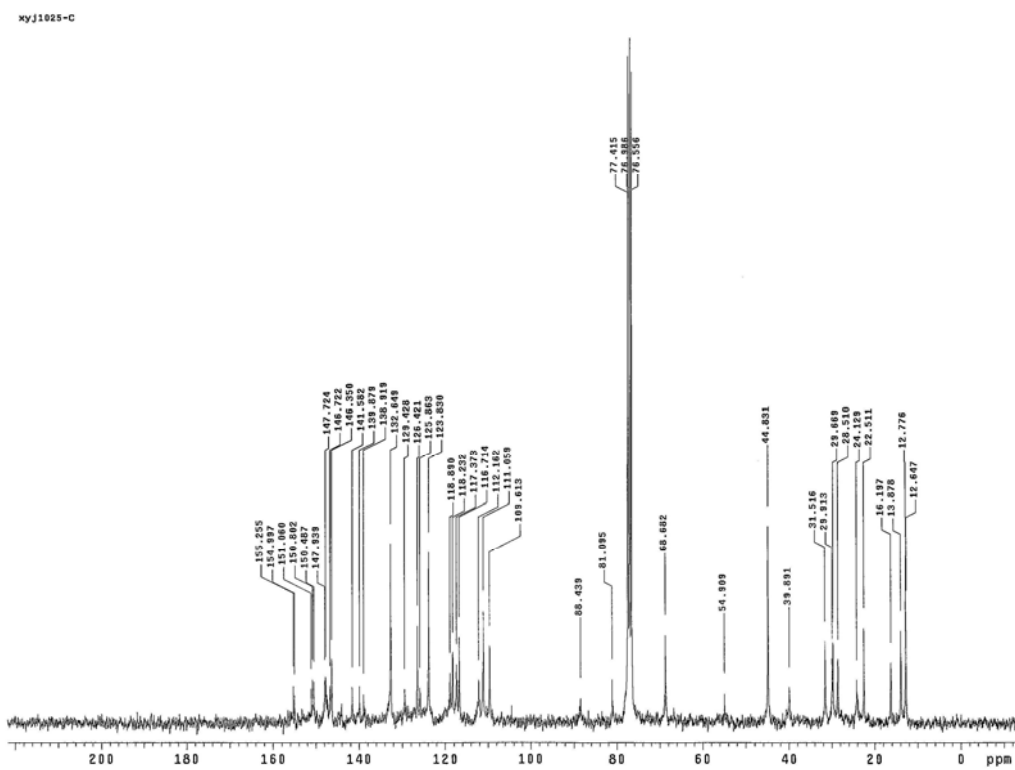

Fig. S16.  $^{13}\text{C}$  NMR spectrum of polymer **P2** in chloroform-*d*.

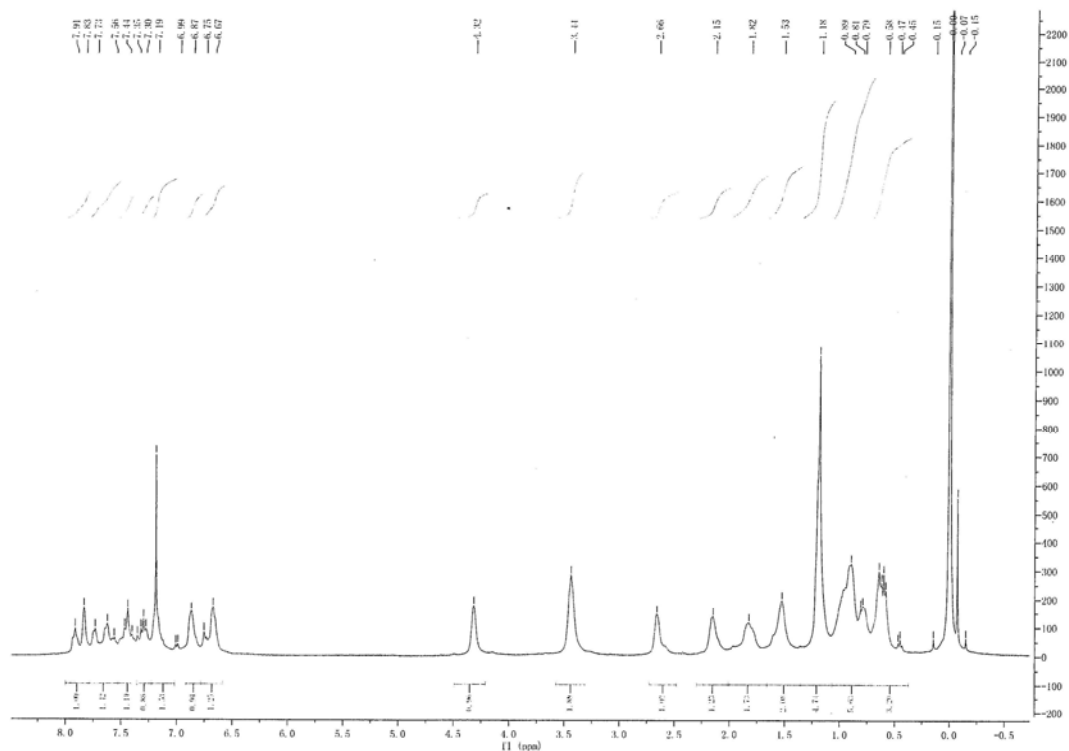

Fig. S17.  $^1\text{H}$  NMR spectrum of polymer **P3** in chloroform-*d*.

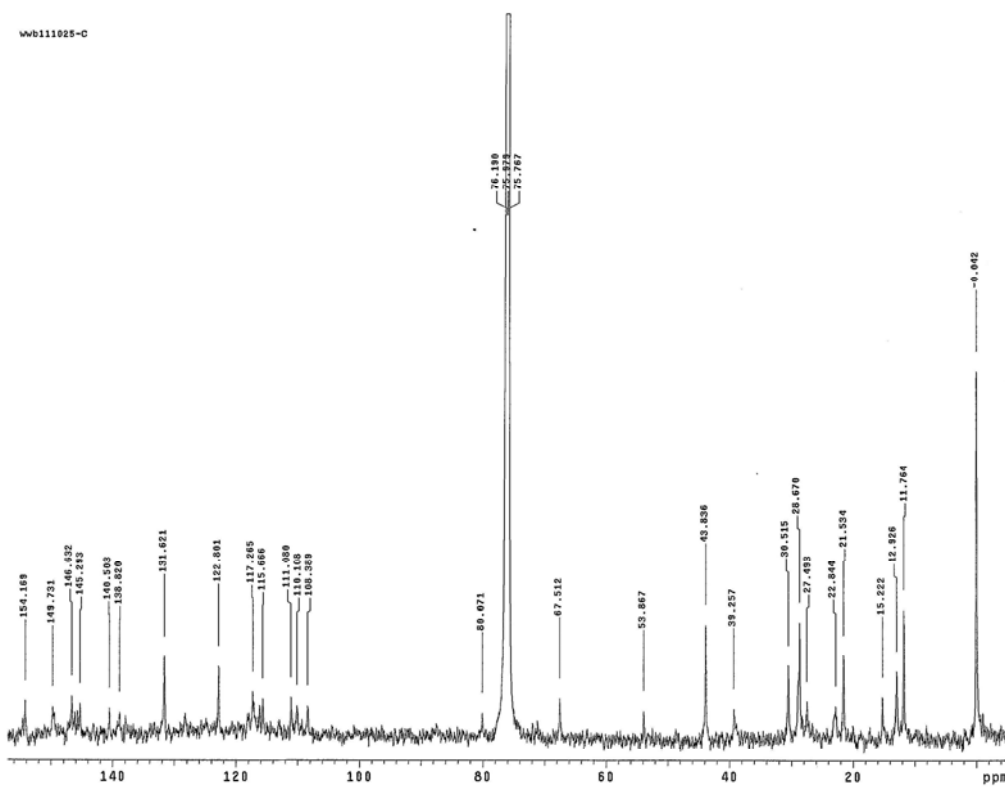

Fig. S18.  $^{13}\text{C}$  NMR spectrum of polymer **P3** in chloroform-*d*.

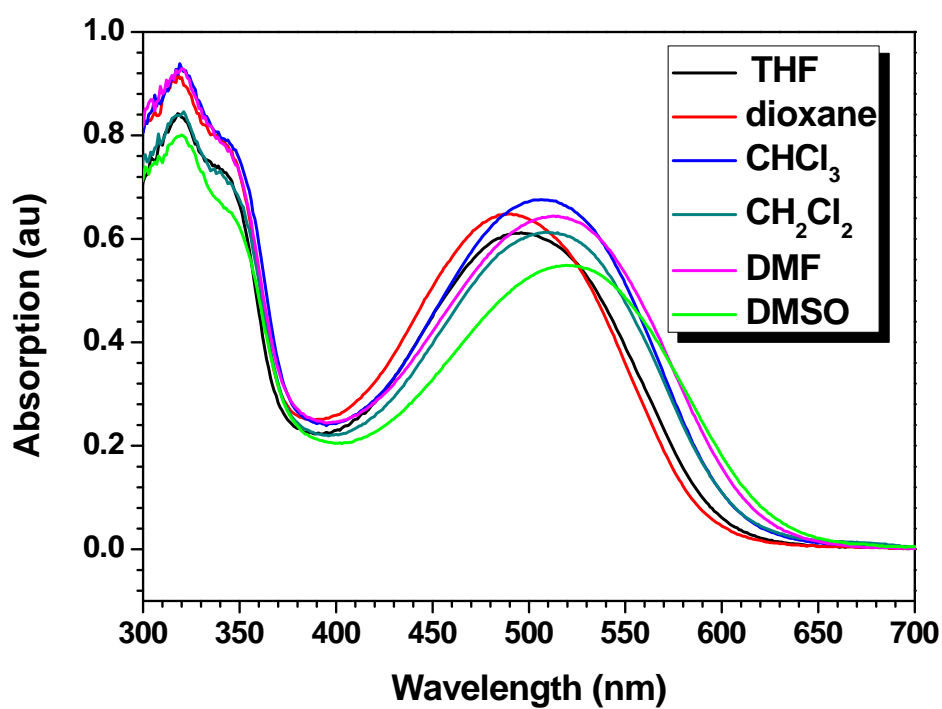

Fig. S19. UV-Vis spectra of P1 in different solutions. (0.02 mg/mL).

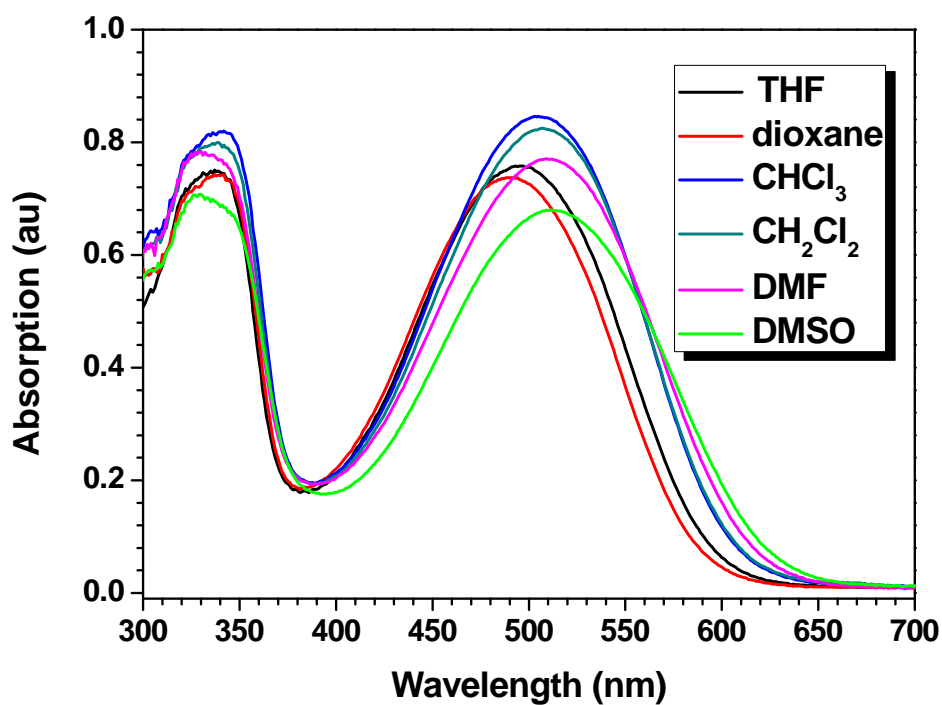

Fig. S20. UV-Vis spectra of P2 in different solutions. (0.02 mg/mL).

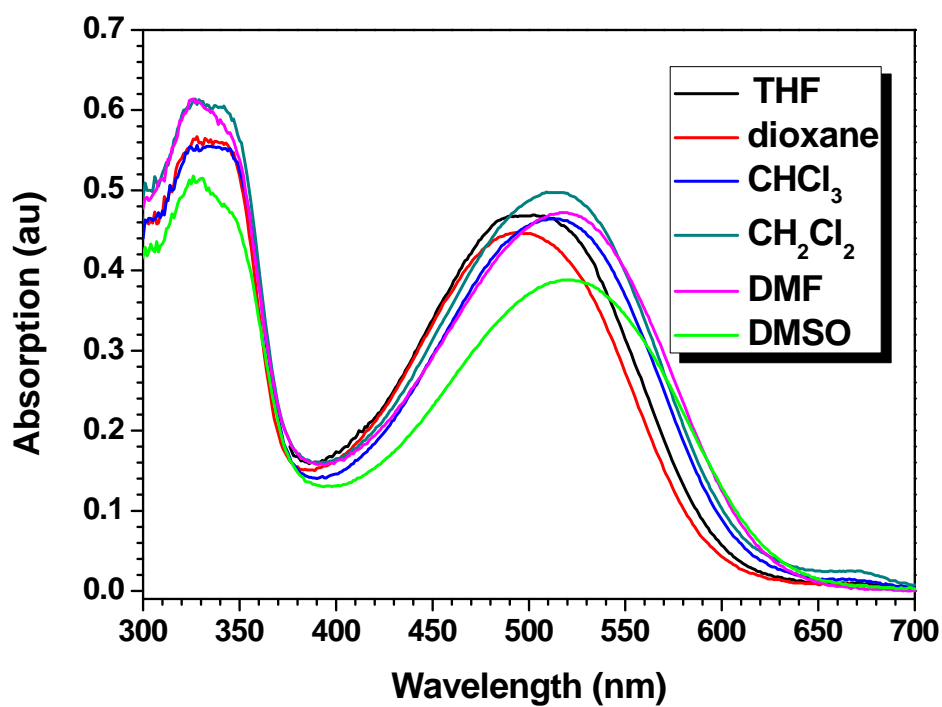

**Fig. S21.** UV-Vis spectra of **P3** in different solutions. (0.02 mg/mL).

**Table S1.** The maximum absorption of polymers ( $\lambda_{\max}$ , nm).<sup>a</sup>

|           | THF | 1,4-dioxane | chloroform | dichloromethane | DMF | DMSO | film |
|-----------|-----|-------------|------------|-----------------|-----|------|------|
| <b>P1</b> | 496 | 487         | 508        | 507             | 512 | 520  | 509  |
| <b>P2</b> | 496 | 487         | 507        | 505             | 509 | 511  | 500  |
| <b>P3</b> | 502 | 495         | 509        | 512             | 516 | 519  | 510  |

<sup>a</sup> The maximum absorption wavelength of polymer solutions with the concentrations fixed at 0.02 mg/mL.

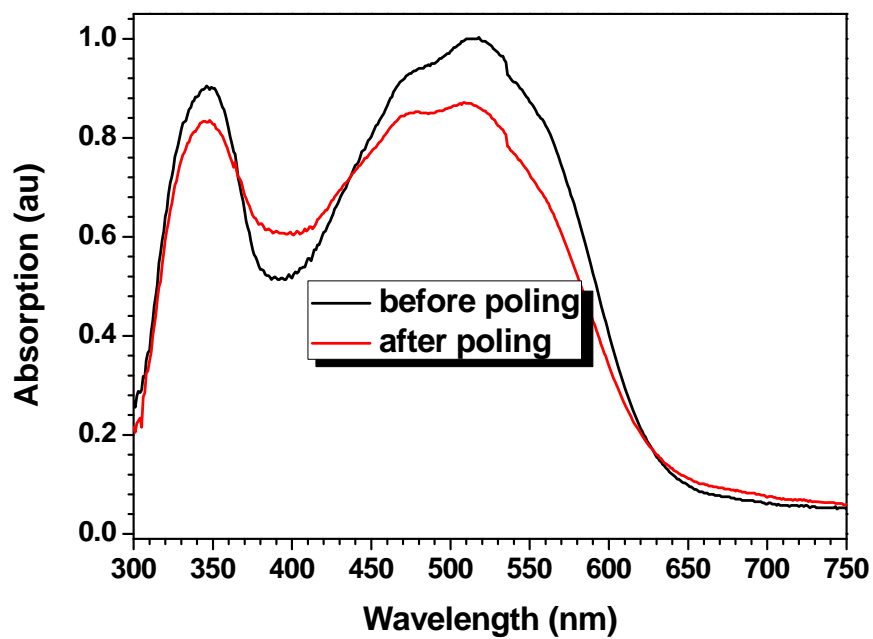

Fig. S22. Absorption spectra of the film of **P3** before and after poling.
